# Supplementary material for: Cellular imaging and mitochondria targeted photo-cytotoxicity in visible light by singlet oxygen using a BODIPY-appended oxovanadium(iv) DNA crosslinking agent
Source: Royal Society of Chemistry journal article supplement (doi:10.1039/c6md00071a), 2016-01-01
Supplement: c6md00071a1.pdf [file c6md00071a1.pdf]

## **Cellular imaging and mitochondria targeted photo-cytotoxicity in visible light by singlet oxygen using a BODIPY-appended oxovanadium(IV) DNA crosslinking agent**

**Arun Kumar,<sup>a</sup> Akanksha Dixit,<sup>b</sup> Samya Banerjee,<sup>a</sup> Arnab Bhattacharyya,<sup>a</sup> Aditya Garai,<sup>a</sup> Anjali A. Karande,<sup>\*b</sup> and Akhil R. Chakravarty<sup>\*a</sup>**

*<sup>a</sup> Department of Inorganic and Physical Chemistry, Indian Institute of Science and <sup>b</sup> Department of Biochemistry, Indian Institute of Science, Bangalore 560012, India. 560012, India. E-mail: arc@ipc.iisc.ernet.in; anjali@biochem.iisc.ernet.in*

**Electronic Supplementary Information (ESI)**

## Experimental Section

### Materials and measurements

All the reagents and chemicals were procured from commercial sources (s.d. Fine Chemicals, India; Aldrich, USA) and used as such. Solvents were purified by standard procedures.<sup>S1</sup> Dulbecco's Modified Eagle's medium (DMEM), ethidium bromide, 3-(4,5-dimethylthiazol-2-yl)-2,5-diphenyltetrazolium bromide (MTT), annexin V-FITC and agarose (molecular biology grade) were procured from Sigma-Aldrich (USA). Supercoiled (SC) pUC19 DNA (cesium chloride purified) was from Bangalore Genie (India). The ligands, *viz.*, BODIPY and benzyldipicolylamine were prepared by reported procedures.<sup>S2</sup> Synthesis of the complexes was carried out under nitrogen atmosphere using Schlenk technique. Tetrabutylammonium perchlorate (TBAP) was prepared using tetrabutylammonium bromide and perchloric acid.

The elemental analysis was done using a Thermo Finnigan FLASH EA 1112 CHNS analyzer. The infrared and electronic spectra were recorded on Perkin Elmer Lambda 35 and Perkin Elmer spectrum one 55, respectively, at 25 °C. Molar conductivity measurements were done using a Control Dynamics (India) conductivity meter. Electrochemical measurements were made at 25 °C on an EG&G PAR model 253 VersaStat potentiostat/galvanostat with electrochemical analysis software 270 using a three electrode setup consisting of a glassy carbon working, platinum wire auxiliary and a saturated calomel reference electrode (SCE) in DMF. TBAP (0.1 M) was used as a supporting electrolyte for the electrochemical measurements. Electrospray ionization (ESI) mass spectral measurements were made using Bruker Daltonics make Esquire 300 Plus ESI model. Magnetic susceptibility measurements at 298 K were carried out with solid sample using MPMS SQUID VSM (Quantum Design, USA). Flow cytometric analysis was performed using FACS Calibur (Becton Dickinson (BD) cell analyzer) at FL2

channel (595 nm). Confocal microscopy was done using confocal scanning electron microscope (Leica, TCS SP5 DM6000).

### **Solubility and stability**

The complexes displayed good solubility in DMF, DMSO, methanol, ethanol and acetonitrile. They had poor or less solubility in hydrocarbons. The complexes were found to be stable in the monocationic form due to dissociation of the chloride and the solution stability of the cationic species was ascertained from the ESI-MS and the molar conductivity data.

### **Computational methodology**

To rationalize the photophysical properties of the complexes, computational studies were performed for both the complexes using B3LYP/LANL2DZ level of DFT.<sup>S3</sup> The hybrid U3LYP functional and LANL2DZ basis set were used in all calculations as incorporated in Gaussian 09 package.<sup>S4</sup> Visualizations of the optimized structures and the MOs were performed using Gaussview5.0. To ascertain stationary points, further frequency test was performed.

### **References**

- (S1) D. D. Perrin, W. L. F. Armarego and D. R. Perrin, *Purification of Laboratory Chemicals*; Pergamon Press: Oxford, 1980.
- (S2) (a) P. C. Kunz, N. E. Brückmann and B. Spingler, *Eur. J. Inorg. Chem.*, **2007**, 394-399.  
(b) B. W. Michel, A. R. Lippert and C. J. Chang, *J. Am. Chem.Soc.*, **2012**, 134, 15668–15671.

(S3) (a) A. D. Becke, *Phys. Rev.*, 1998, **A38**, 3098-3100; (b) A.D. Becke, *J. Chem. Phys.*, 1993, **98**, 5648-5652; (c) C. Lee, W. Yang and R.G. Parr, *Phys. Rev., B*. 1988, **37**, 785-789; (d) P.J. Hay and W.R. Wadt, *J. Chem. Phys.*, 1985, **82**, 284-298.

(S4) Gaussian 09, Revision A.02, M. J. Frisch, G. W. Trucks, H. B. Schlegel, G. E. Scuseria, M. A. Robb, J. R. Cheeseman, G. Scalmani, V. Barone, B. Mennucci, G. A. Petersson, H. Nakatsuji, M. Caricato, X. Li, H. P. Hratchian, A. F. Izmaylov, J. Bloino, G. Zheng, J. L. Sonnenberg, M. Hada, M. Ehara, K. Toyota, R. Fukuda, J. Hasegawa, M. Ishida, T. Nakajima, Y. Honda, O. Kitao, H. Nakai, T. Vreven, J. A. Montgomery, Jr., J. E. Peralta, F. Ogliaro, M. Bearpark, J. J. Heyd, E. Brothers, K. N. Kudin, V. N. Staroverov, R. Kobayashi, J. Normand, K. Raghavachari, A. Rendell, J. C. Burant, S. S. Iyengar, J. Tomasi, M. Cossi, N. Rega, J. M. Millam, M. Klene, J. E. Knox, J. B. Cross, V. Bakken, C. Adamo, J. Jaramillo, R. Gomperts, R. E. Stratmann, O. Yazyev, A. J. Austin, R. Cammi, C. Pomelli, J. W. Ochterski, R. L. Martin, K. Morokuma, V. G. Zakrzewski, G. A. Voth, P. Salvador, J. J. Dannenberg, S. Dapprich, A. D. Daniels, O. Farkas, J. B. Foresman, J. V. Ortiz, J. Cioslowski, and D. J. Fox, Gaussian, Inc., Wallingford CT, 2009.

**Table 1:** Selected bond distances (Å) and angles (°) for [VO(benzyldipicolylamine)Cl<sub>2</sub>] (**1**) with e.s.d.s in the parentheses

|                      |            |                      |            |
|----------------------|------------|----------------------|------------|
| V(1)-O(1)            | 1.590(2)   | V(2)-O(2)            | 1.588(2)   |
| V(1)-N(1)            | 2.390(2)   | V(2)-N(4)            | 2.389(2)   |
| V(1)-N(2)            | 2.137(3)   | V(2)-N(5)            | 2.144(3)   |
| V(1)-N(3)            | 2.138(3)   | V(2)-N(6)            | 2.136(3)   |
| V(1)-Cl(1)           | 2.3459(10) | V(2)-Cl(3)           | 2.3457(11) |
| V(1)-Cl(2)           | 2.3517(10) | V(2)-Cl(4)           | 2.3450(11) |
| Cl(1)-V(1)-<br>Cl(2) | 93.53(4)   | Cl(3)-V(2)-<br>Cl(4) | 96.83(4)   |
| O(1)-V(1)-N(1)       | 164.30(12) | O(2)-V(2)-N(4)       | 165.01(12) |

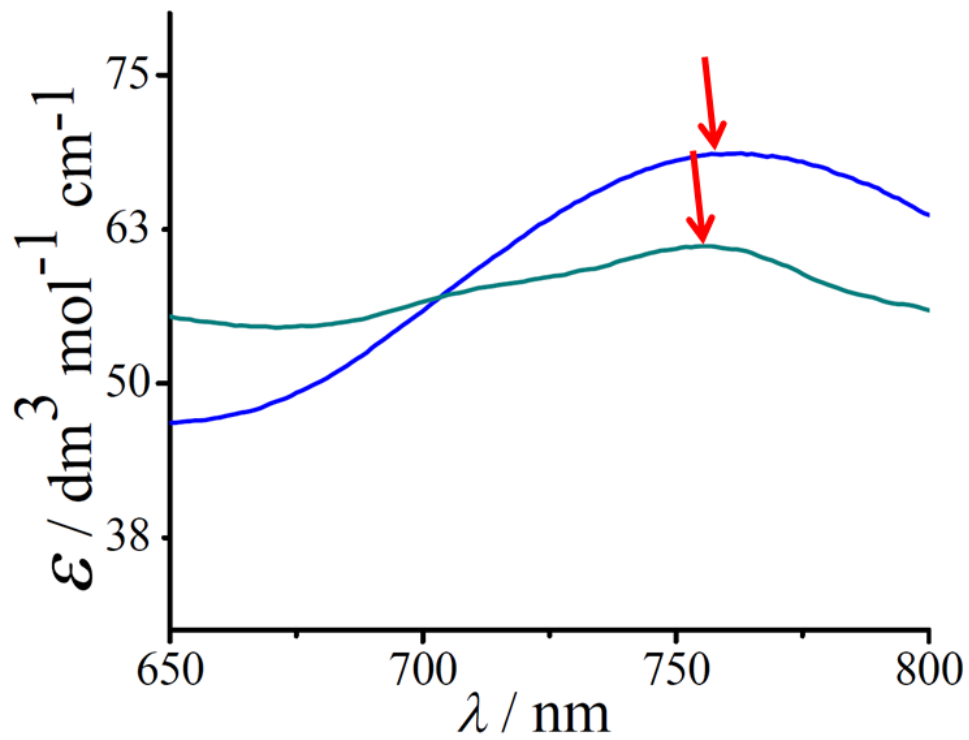

**Fig S1.** Absorption spectra of the complexes **1** (—) and **2** (—), showing the d-d band, in 20% aqueous DMF.

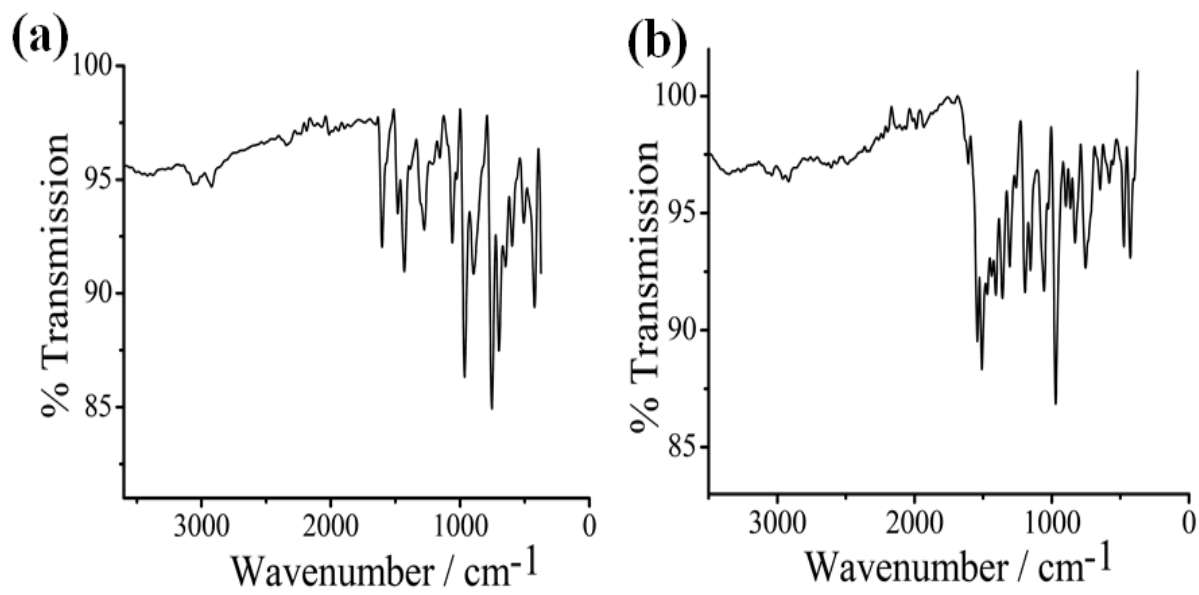

**Fig S2.** IR spectra of the complexes **1** (a) and **2** (b).

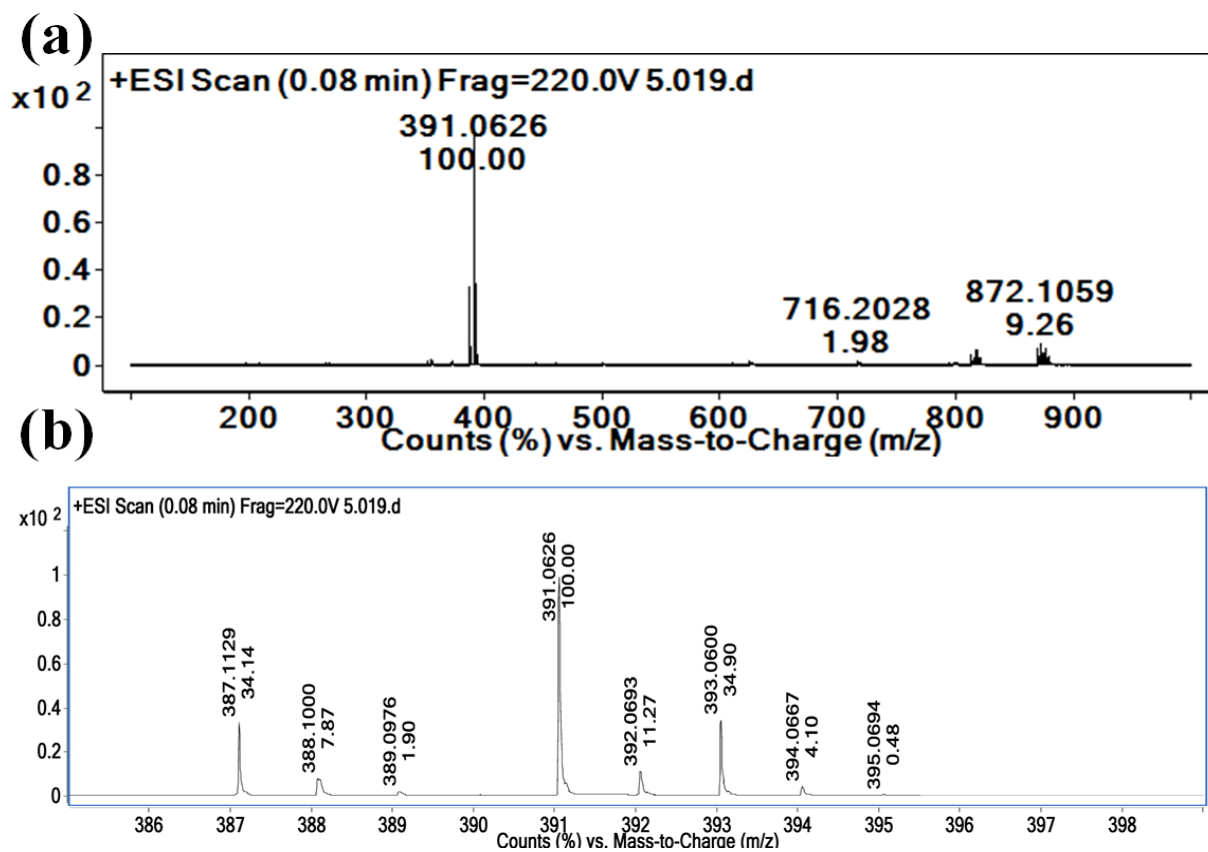

**Fig S3.** The ESI-MS spectrum of complex **1** showing the prominent  $[M-Cl]^+$  peak in methanol

(b) The isotopic distribution of the molecular ion peak.



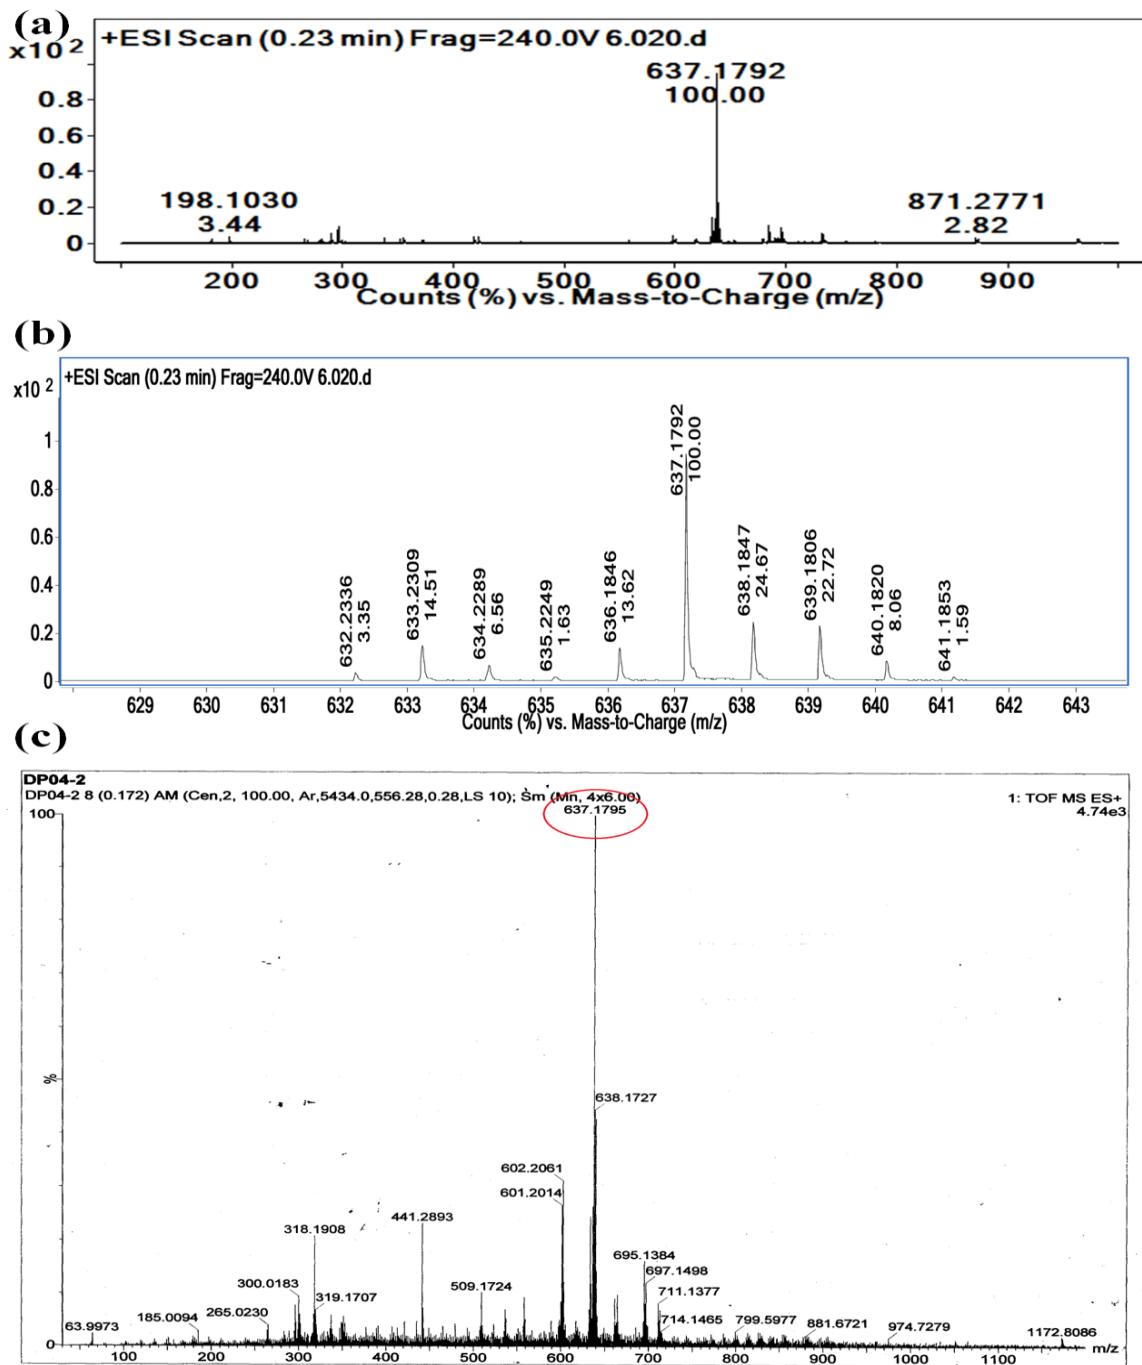

**Fig S4.** (a) The ESI-MS spectrum of complex **2** showing the prominent  $[M-Cl]^+$  peak in methanol. (b) The isotropic distribution of the molecular ion peak. (c) The HRMS spectrum showing the prominent  $[M-Cl]^+$  peak at 637.1795 (m/z) in methanol.

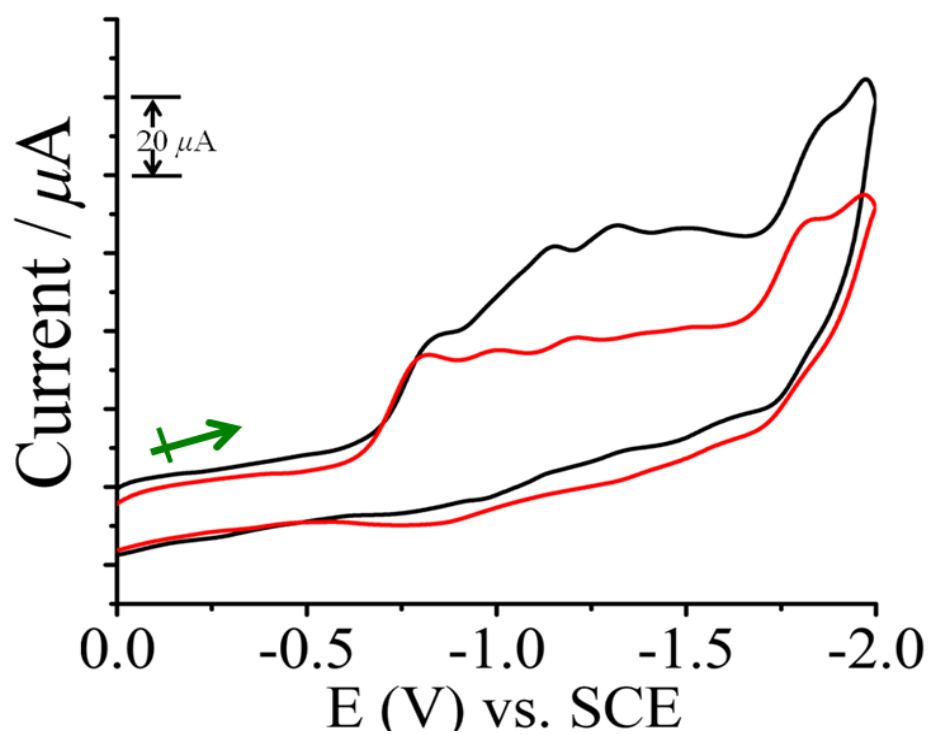

**Fig. S5.** Cyclic voltammograms of the complexes **1** (—) and **2** (—) showing the cathodic response in DMF at a scan rate of  $50 \text{ mV s}^{-1}$  and 0.1 mol TBAP as the supporting electrolyte.

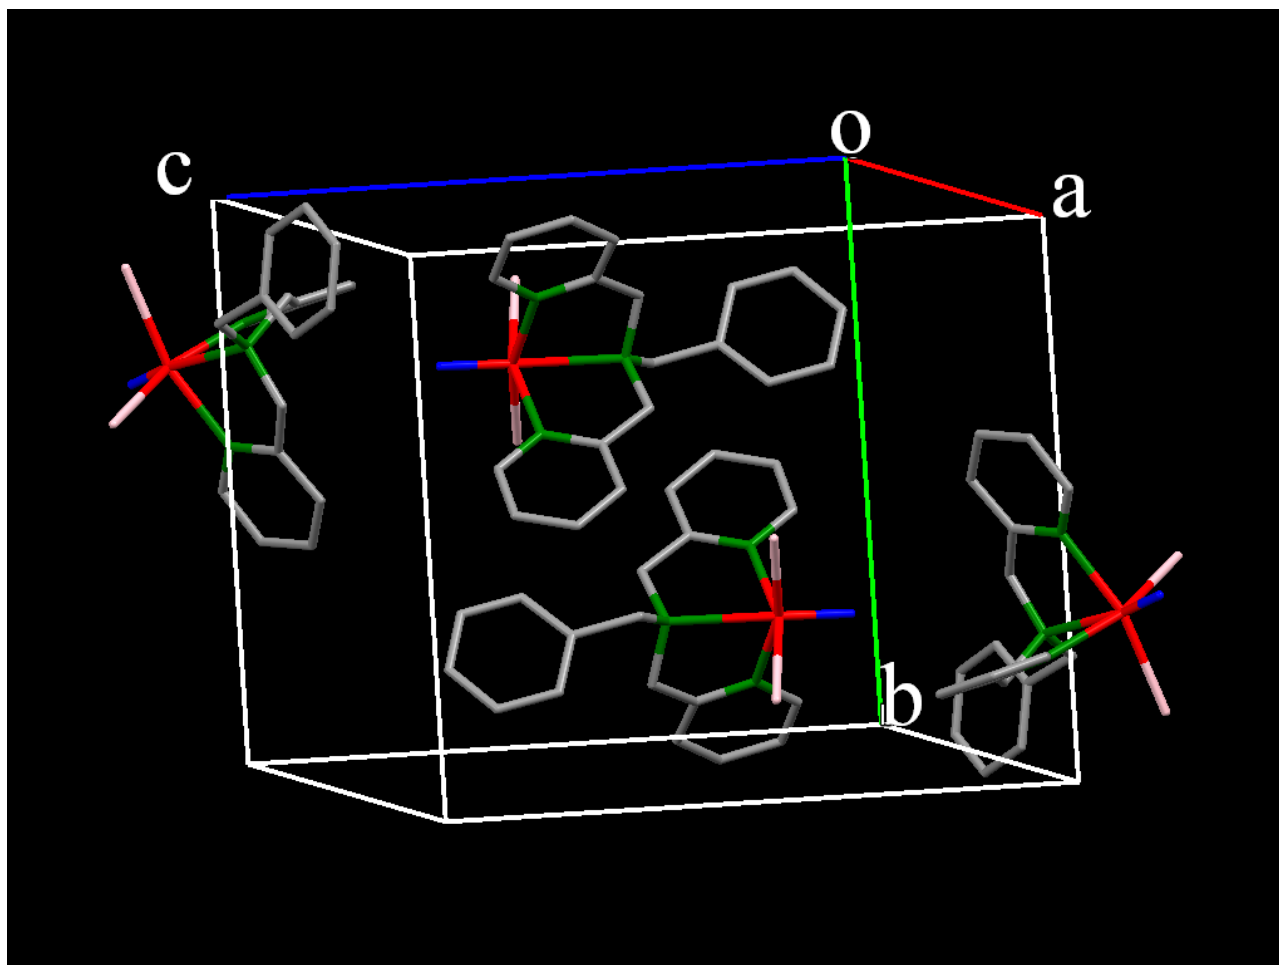

**Fig. S6.** Unit cell packing diagram of Complex **1**. [color codes: C grey, N green, O blue, V red, Cl pink]

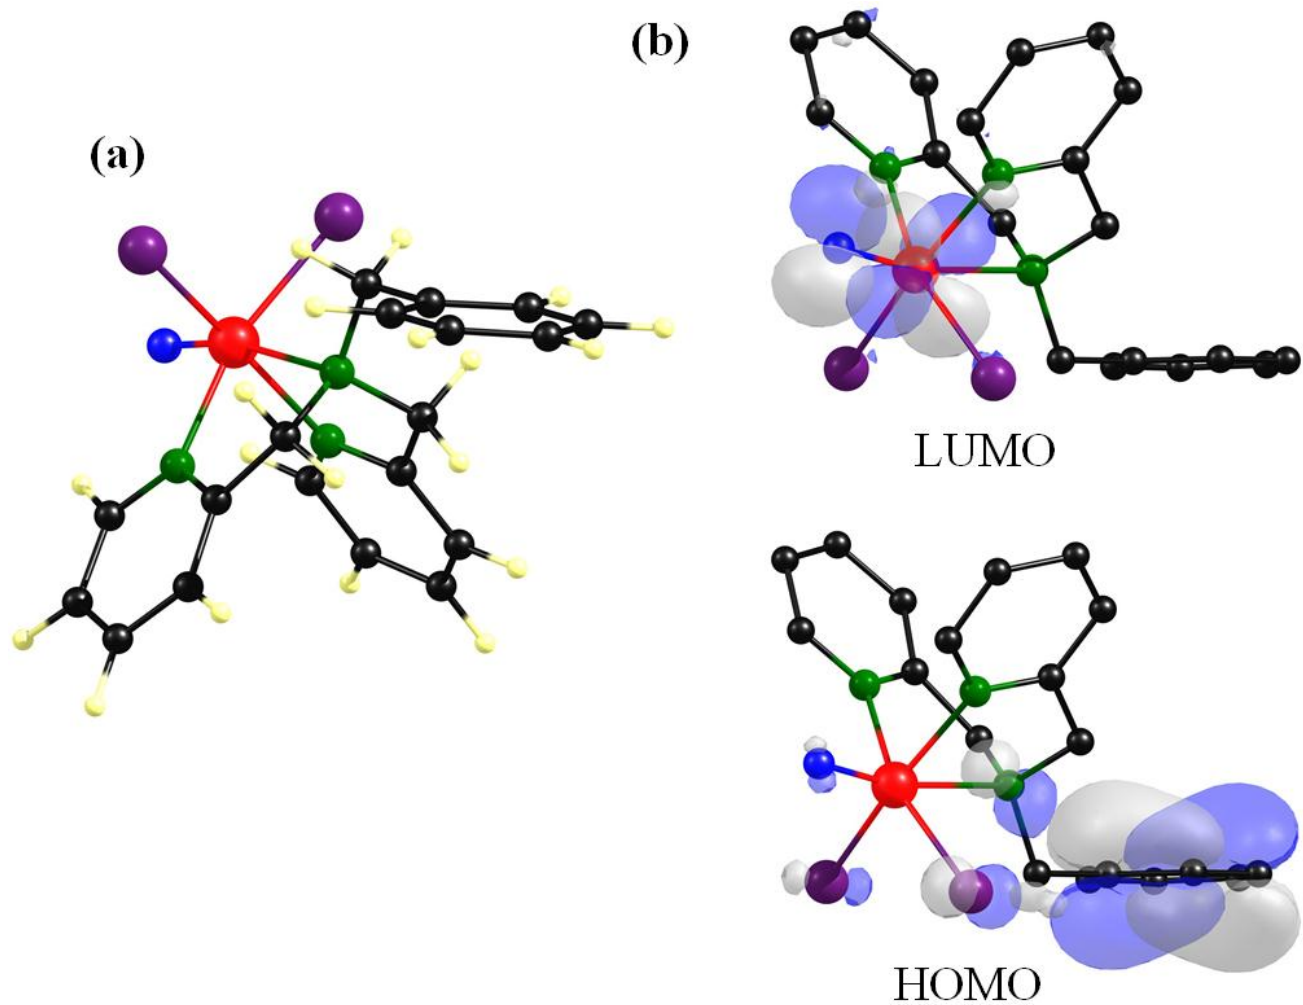

**Fig. S7.** (a) The energy-optimized structure of the complex **1** [color codes: C black, N green, O blue, V red, Cl purple and H yellow]. (b) The HOMO and LUMO of complex **1**.

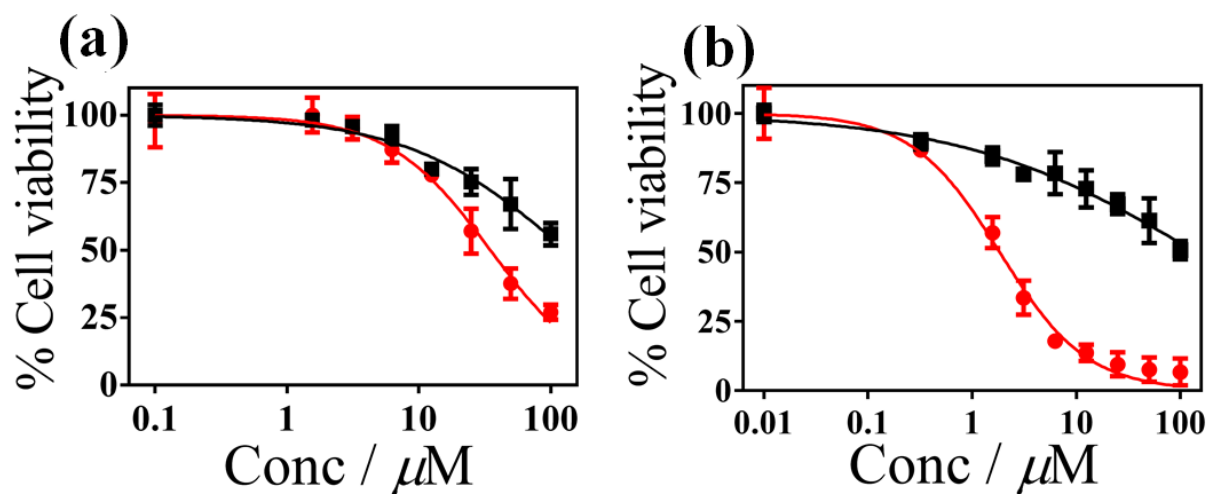

**Fig. S8.** Photocytotoxicity of the complexes (a) Complex 1 and (b) Complex 2, in HeLa cell lines on 4 h incubation in dark followed upon photo-irradiation in visible light (400 to 700 nm) for 1 h as determined by MTT assay. The photo-exposed and dark-treated cells are shown in red and black colour symbols, respectively.

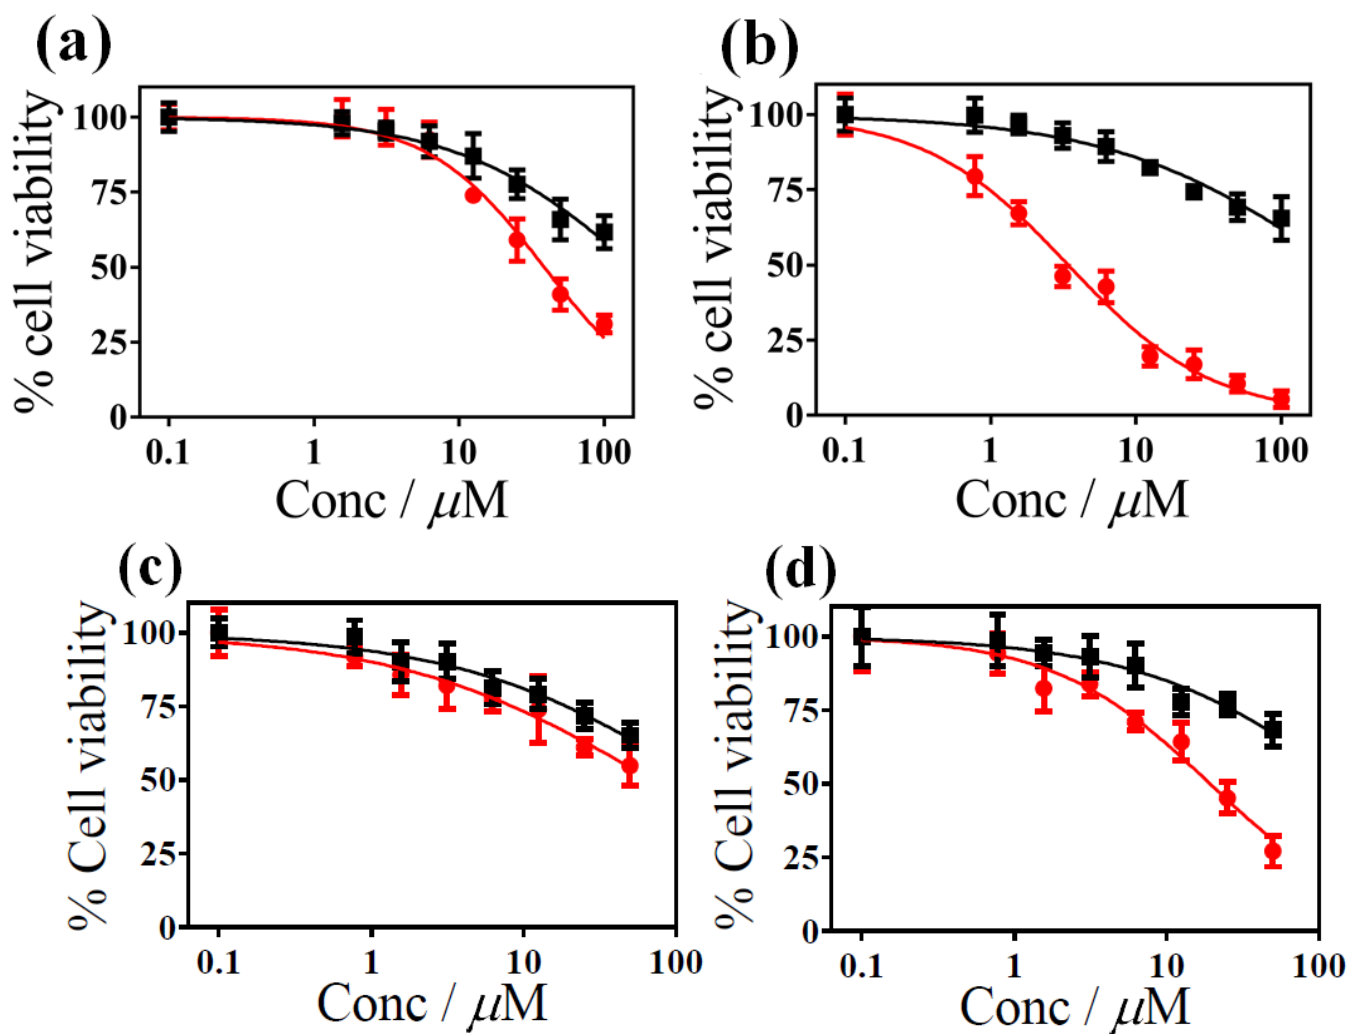

**Fig. S9.** Photocytotoxicity of the complexes (a) Complex 1 and (b) Complex 2 in MCF-7 cell lines (c) Complex 1 and (d) Complex 2 in MCF-10 A cell lines, on 4 h incubation in dark followed upon photo-irradiation in visible light (400 to 700 nm) for 1 h as determined by MTT assay. The photo-exposed and dark-treated cells are shown in red and black colour symbols, respectively.

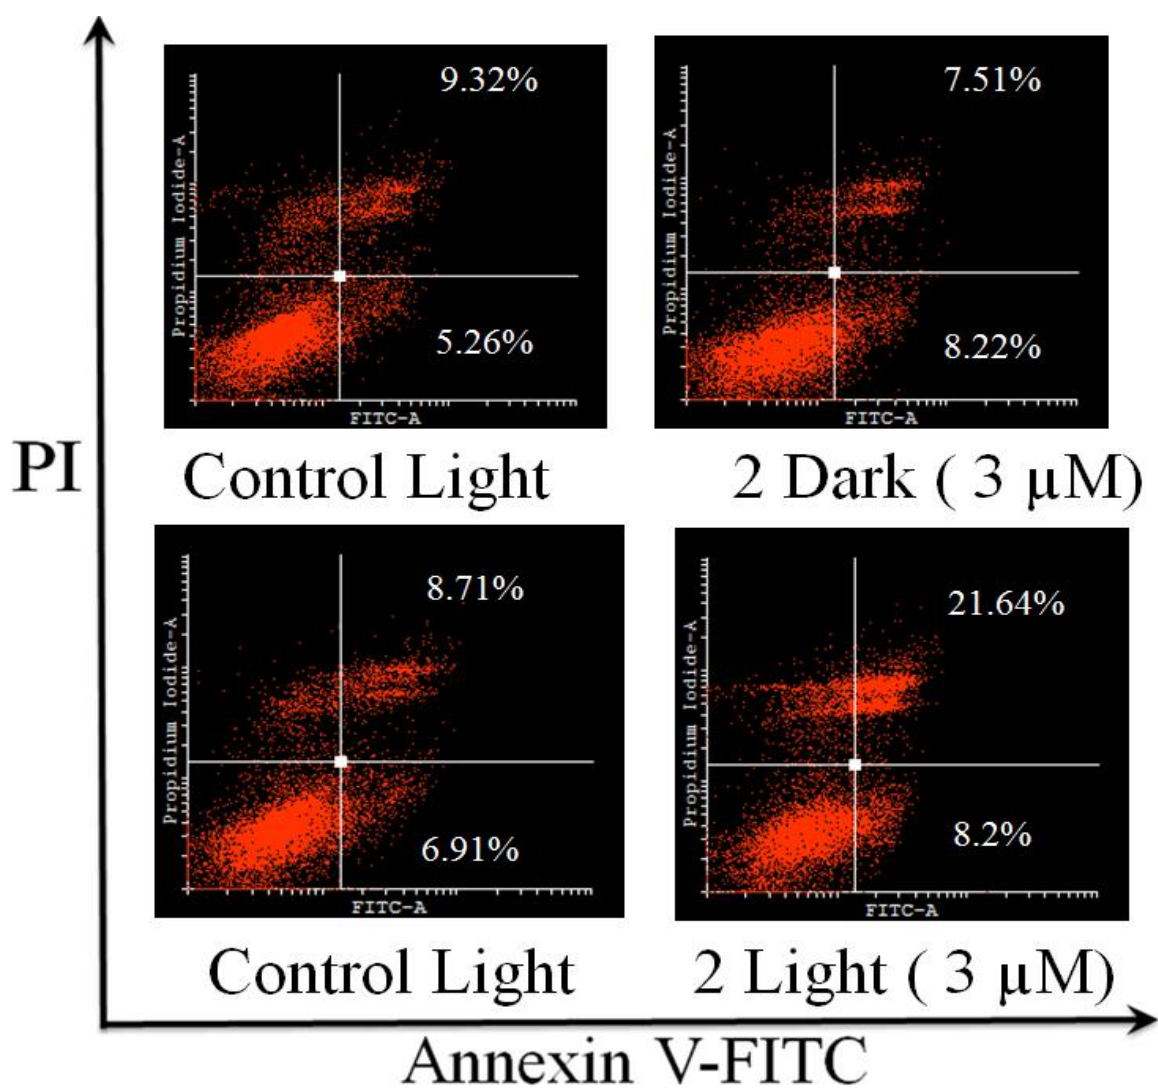

**Fig. S10.** FACSscan profiles of Annexin-V FITC and propidium iodide (PI) staining of HeLa cells undergoing apoptosis induced by complex 2 in dark and in visible light (400-700 nm).

**Table S2 : Computational data for complex 1**

| Center<br>Number | Atomic<br>Number | Atomic<br>Type | Coordinates (Angstroms) |           |           |
|------------------|------------------|----------------|-------------------------|-----------|-----------|
|                  |                  |                | X                       | Y         | Z         |
| 1                | 23               | 0              | 1.265690                | 0.045431  | 1.307920  |
| 2                | 17               | 0              | 0.390564                | -1.736927 | 2.675907  |
| 3                | 17               | 0              | 0.266037                | 1.844801  | 2.570989  |
| 4                | 7                | 0              | -0.752608               | -0.047880 | 0.122354  |
| 5                | 7                | 0              | 1.595750                | 1.389356  | -0.280580 |
| 6                | 7                | 0              | 1.693545                | -1.353329 | -0.209185 |
| 7                | 6                | 0              | 0.572986                | 1.668031  | -1.124925 |
| 8                | 6                | 0              | -0.795482               | 1.189633  | -0.713739 |
| 9                | 1                | 0              | -1.237242               | 1.980582  | -0.096311 |
| 10               | 1                | 0              | -1.438855               | 1.058210  | -1.592079 |
| 11               | 6                | 0              | 2.837432                | 1.875367  | -0.531509 |
| 12               | 1                | 0              | 3.608382                | 1.610468  | 0.181479  |
| 13               | 6                | 0              | 0.705238                | -1.704209 | -1.067249 |
| 14               | 6                | 0              | -0.697949               | -1.294465 | -0.698834 |
| 15               | 1                | 0              | -1.322105               | -1.213901 | -1.596974 |
| 16               | 1                | 0              | -1.108101               | -2.103662 | -0.083600 |
| 17               | 6                | 0              | 2.961949                | -1.788329 | -0.418178 |
| 18               | 1                | 0              | 3.703143                | -1.466430 | 0.302827  |
| 19               | 6                | 0              | -3.297070               | -0.077654 | 0.256113  |
| 20               | 6                | 0              | -1.978831               | -0.087756 | 1.013397  |
| 21               | 1                | 0              | -1.908570               | 0.777439  | 1.676225  |
| 22               | 1                | 0              | -1.886567               | -0.986733 | 1.626263  |
| 23               | 6                | 0              | 0.773221                | 2.444410  | -2.271870 |
| 24               | 1                | 0              | -0.059794               | 2.645808  | -2.934757 |
| 25               | 6                | 0              | 0.969138                | -2.497770 | -2.189552 |
| 26               | 1                | 0              | 0.162286                | -2.754172 | -2.865589 |
| 27               | 6                | 0              | 2.274651                | -2.951885 | -2.412948 |
| 28               | 1                | 0              | 2.500301                | -3.567260 | -3.275921 |
| 29               | 6                | 0              | -3.890419               | -1.278525 | -0.179899 |
| 30               | 1                | 0              | -3.410032               | -2.228907 | 0.037901  |
| 31               | 6                | 0              | -3.967933               | 1.135138  | 0.005184  |
| 32               | 1                | 0              | -3.545106               | 2.069264  | 0.367007  |
| 33               | 6                | 0              | -5.761565               | -0.050157 | -1.131853 |
| 34               | 1                | 0              | -6.707043               | -0.039578 | -1.663833 |
| 35               | 6                | 0              | -5.189348               | 1.152290  | -0.685602 |
| 36               | 1                | 0              | -5.694219               | 2.095351  | -0.866711 |
| 37               | 6                | 0              | -5.110700               | -1.267554 | -0.872692 |
| 38               | 1                | 0              | -5.554825               | -2.201899 | -1.199713 |
| 39               | 8                | 0              | 2.772318                | 0.114953  | 1.807789  |



|    |   |   |          |           |           |
|----|---|---|----------|-----------|-----------|
| 40 | 6 | 0 | 3.099557 | 2.669191  | -1.648855 |
| 41 | 1 | 0 | 4.100146 | 3.045191  | -1.817334 |
| 42 | 6 | 0 | 3.286964 | -2.598786 | -1.507212 |
| 43 | 1 | 0 | 4.307344 | -2.932530 | -1.642492 |
| 44 | 6 | 0 | 2.050727 | 2.953101  | -2.537480 |
| 45 | 1 | 0 | 2.227023 | 3.556892  | -3.419968 |

---

**Table S3** : Computational data for complex 2

| Center<br>Number | Atomic<br>Number | Atomic<br>Type | Coordinates (Angstroms) |           |           |
|------------------|------------------|----------------|-------------------------|-----------|-----------|
|                  |                  |                | X                       | Y         | Z         |
| 1                | 5                | 0              | -6.839758               | 0.594765  | -0.107048 |
| 2                | 9                | 0              | -7.796335               | 0.823501  | 0.955211  |
| 3                | 9                | 0              | -7.559424               | 0.838184  | -1.345589 |
| 4                | 7                | 0              | -5.658396               | 1.545592  | 0.015245  |
| 5                | 6                | 0              | -4.302078               | 1.148604  | 0.049689  |
| 6                | 6                | 0              | -3.500795               | 2.337300  | 0.084131  |
| 7                | 6                | 0              | -4.397978               | 3.416527  | 0.080027  |
| 8                | 6                | 0              | -5.717878               | 2.905541  | 0.039121  |
| 9                | 6                | 0              | -3.958143               | -0.213110 | 0.036834  |
| 10               | 6                | 0              | -4.954898               | -1.198664 | -0.015710 |
| 11               | 7                | 0              | -6.320578               | -0.834615 | -0.065962 |
| 12               | 6                | 0              | -7.076152               | -1.966459 | -0.068345 |
| 13               | 6                | 0              | -6.212715               | -3.088974 | -0.019312 |
| 14               | 6                | 0              | -4.887412               | -2.631214 | 0.017188  |
| 15               | 1                | 0              | -4.139436               | 4.465039  | 0.098341  |
| 16               | 1                | 0              | -6.535834               | -4.119439 | -0.006707 |
| 17               | 6                | 0              | -2.522626               | -0.605633 | 0.095747  |
| 18               | 6                | 0              | -1.842043               | -0.589822 | 1.323275  |
| 19               | 6                | 0              | -1.845770               | -0.994132 | -1.070938 |
| 20               | 6                | 0              | -0.487786               | -0.943951 | 1.378470  |
| 21               | 1                | 0              | -2.370803               | -0.307538 | 2.228536  |
| 22               | 6                | 0              | -0.489367               | -1.338788 | -1.009614 |
| 23               | 1                | 0              | -2.375972               | -1.026298 | -2.017796 |
| 24               | 6                | 0              | 0.212309                | -1.302817 | 0.210581  |
| 25               | 1                | 0              | 0.020225                | -0.952495 | 2.338775  |
| 26               | 1                | 0              | 0.020298                | -1.653015 | -1.916382 |
| 27               | 6                | 0              | 1.687007                | -1.665919 | 0.264627  |
| 28               | 7                | 0              | 2.614771                | -0.481846 | 0.081670  |
| 29               | 1                | 0              | 1.943746                | -2.117767 | 1.224970  |
| 30               | 1                | 0              | 1.938478                | -2.382131 | -0.520322 |
| 31               | 23               | 0              | 4.885761                | -1.066709 | 0.111778  |
| 32               | 6                | 0              | 2.418943                | 0.481610  | 1.206160  |
| 33               | 6                | 0              | 2.369029                | 0.136981  | -1.255430 |
| 34               | 17               | 0              | 4.305498                | -2.813899 | -1.449814 |
| 35               | 17               | 0              | 4.385306                | -2.324050 | 2.110287  |
| 36               | 7                | 0              | 4.848199                | 0.704136  | 1.252066  |
| 37               | 7                | 0              | 4.791405                | 0.334696  | -1.459272 |
| 38               | 8                | 0              | 6.472017                | -1.142662 | 0.086231  |
| 39               | 6                | 0              | 3.654014                | 1.291041  | 1.509974  |
| 40               | 1                | 0              | 2.203095                | -0.110019 | 2.103382  |
| 41               | 1                | 0              | 1.560122                | 1.140722  | 1.027850  |
| 42               | 6                | 0              | 3.582650                | 0.835036  | -1.813572 |
| 43               | 1                | 0              | 1.509211                | 0.817719  | -1.233050 |
| 44               | 1                | 0              | 2.128957                | -0.677885 | -1.948198 |
| 45               | 6                | 0              | 6.001954                | 1.325015  | 1.604749  |
| 46               | 6                | 0              | 5.924306                | 0.839161  | -2.009793 |
| 47               | 6                | 0              | 3.583228                | 2.547320  | 2.122566  |
| 48               | 6                | 0              | 3.475250                | 1.885421  | -2.731975 |
| 49               | 1                | 0              | 6.919466                | 0.802366  | 1.364983  |
| 50               | 6                | 0              | 5.999187                | 2.569339  | 2.236566  |
| 51               | 1                | 0              | 6.855860                | 0.396846  | -1.678855 |
| 52               | 6                | 0              | 5.884399                | 1.874293  | -2.945315 |
| 53               | 1                | 0              | 2.616114                | 2.999838  | 2.306873  |
| 54               | 6                | 0              | 4.768951                | 3.194818  | 2.491880  |
| 55               | 1                | 0              | 2.497479                | 2.274400  | -2.989845 |
| 56               | 6                | 0              | 4.639302                | 2.411612  | -3.306466 |
| 57               | 1                | 0              | 6.937135                | 3.034922  | 2.509330  |
| 58               | 1                | 0              | 6.806680                | 2.251346  | -3.367586 |
| 59               | 1                | 0              | 4.734880                | 4.167645  | 2.968088  |
| 60               | 1                | 0              | 4.577426                | 3.225321  | -4.019433 |
| 61               | 6                | 0              | -2.002786               | 2.461346  | 0.112846  |
| 62               | 1                | 0              | -1.594480               | 2.150101  | 1.080472  |

|    |   |   |           |           |           |
|----|---|---|-----------|-----------|-----------|
| 63 | 1 | 0 | -1.526740 | 1.837688  | -0.651093 |
| 64 | 1 | 0 | -1.714938 | 3.501940  | -0.058204 |
| 65 | 6 | 0 | -3.670610 | -3.510199 | 0.083272  |
| 66 | 1 | 0 | -3.105906 | -3.481029 | -0.854446 |
| 67 | 1 | 0 | -2.986564 | -3.199767 | 0.879385  |
| 68 | 1 | 0 | -3.970186 | -4.545141 | 0.266963  |
| 69 | 6 | 0 | -8.570460 | -1.943628 | -0.094166 |
| 70 | 1 | 0 | -8.964885 | -1.630963 | 0.878837  |
| 71 | 1 | 0 | -8.939471 | -1.231909 | -0.838419 |
| 72 | 1 | 0 | -8.958195 | -2.937637 | -0.323716 |
| 73 | 6 | 0 | -7.007902 | 3.660779  | 0.032109  |
| 74 | 1 | 0 | -7.673253 | 3.293650  | -0.755107 |
| 75 | 1 | 0 | -7.530880 | 3.534737  | 0.986155  |
| 76 | 1 | 0 | -6.819909 | 4.724157  | -0.125192 |

---
